# Supplementary material for: Surfactant controlled zwitterionic cellulose nanofibril dispersions
Source: Royal Society of Chemistry journal article supplement (doi:10.1039/c8sm00752g), 2018-01-01
Supplement: c8sm00752g1.pdf [file c8sm00752g1.pdf]

## Electronic Supplementary Information

### Surfactant controlled zwitterionic cellulose nanofibril dispersions

Vincenzo Calabrese,<sup>a</sup> Marcelo A. da Silva,<sup>a</sup> Julien Schmitt,<sup>a</sup> Juan C. Muñoz-Garcia,<sup>b</sup> Valeria Gabrielli,<sup>b</sup> Janet L. Scott,<sup>a,c</sup> Jesus Angulo,<sup>b</sup> Yaroslav Z. Khimyak,<sup>b</sup> Karen J. Edler<sup>a\*</sup>

<sup>a</sup>Department of Chemistry, University of Bath, Claverton Down, Bath, BA2 7AY, UK. E-mail: k.edler@bath.ac.uk; Tel: 01225 384192

<sup>b</sup>School of Pharmacy, University of East Anglia, Norwich Research Park, Norwich, NR4 7TJ, UK

<sup>c</sup>Centre for Sustainable Chemical Technology, University of Bath, Claverton Down, Bath, BA2 7AY, UK. E-mail: j.l.scott@bath.ac.uk University of Bath Tel: 01225 386307

\* Corresponding author: E-mail: k.edler@bath.ac.uk; Tel: 01225 384192

Conductimetric titration (Fig. S1) of the oxidised cellulose nanofibril (OCNF) and the zwitterionic cellulose nanofibril (ZCNF) were performed in according to the protocol of da Silva Perez *et. al* using the following equation:<sup>1</sup>

$$DO = \frac{162 C (V_2 - V_1)}{w - 37 C (V_2 - V_1)}$$

where C is NaOH concentration (mol/l), V<sub>1</sub> and V<sub>2</sub> the volume of NaOH (l) based on the plateau of the curves, w the dry weight of OCNF (g). The value of 162 is the molecular weight of the anhydroglucose unit (AGU, 162 (g/mol)) whilst 36 corresponds to the difference in molecular weight between the AGU and that of the sodium salt of the glucuronic acid (162-199=37 (g/mol)).

The ZCNF did not show a well defined region where conductivity is weakly dependent on NaOH addition, hence, the DO of oxidation was not evaluated using conductimetric titration.

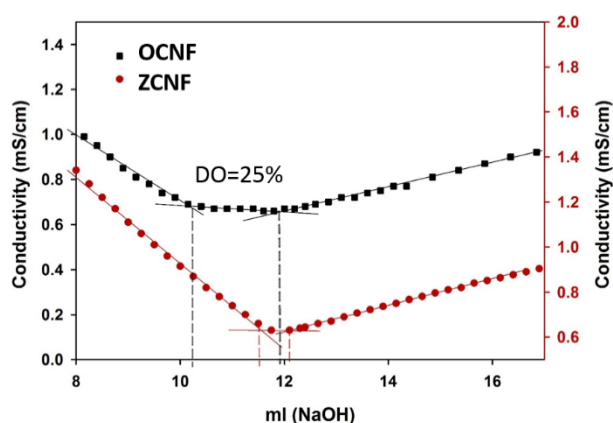

**Fig. S1** Conductimetric titration of OCNF and ZCNF.

Attenuated total reflection Fourier transform infrared (ATR-FTIR) spectroscopy was performed using a Perkin Elmer Frontier. The samples were freeze dried in order to remove all the water and the spectra collected in the range 600 to 4000 cm<sup>-1</sup>. The spectra of OCNF and ZCNF are similar except

for a small difference at  $1479\text{ cm}^{-1}$  in the ZCNF spectra (Fig. S2). Zaman *et. al* associated this peak with the  $\text{CH}_2$  band arising from the cationic substituent.<sup>2</sup>

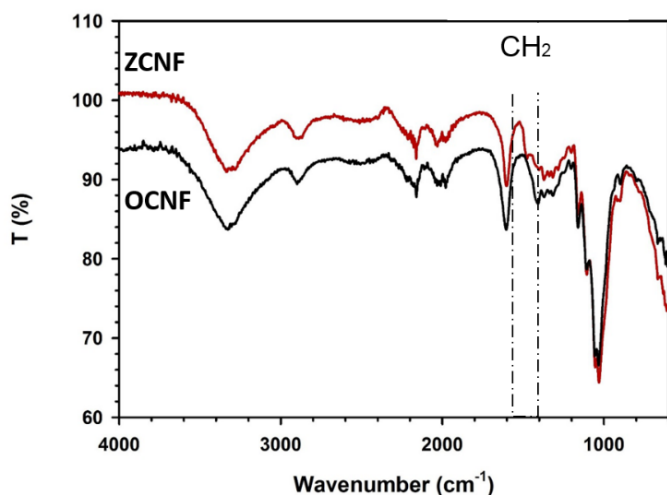

**Fig. S2.** FTIR spectra of OCNF and ZCNF.

The degree of oxidation (DO) derived from  $^{13}\text{C}\{^1\text{H}\}$  DP NMR, calculated as the ratio between the peak areas of the carboxyl group (indicated by an arrow) and the anomeric carbon (peak at 105 ppm), kept constant (*ca.* 25 %) between OCNF and ZCNF samples using 200 s relaxation delay (†ESI Fig. S3). The assessment of DO using the spectra acquired with 800 s relaxation delay is hampered due to poor S/N for the carboxylate peak after 512 scans (Figure 1, †ESI Fig. S4), in spite of 5 days of experimental time. The DO obtained from the experiments with 200 s relaxation delay demonstrates the absence of impact of GTMAC coupling on the degree of oxidation.

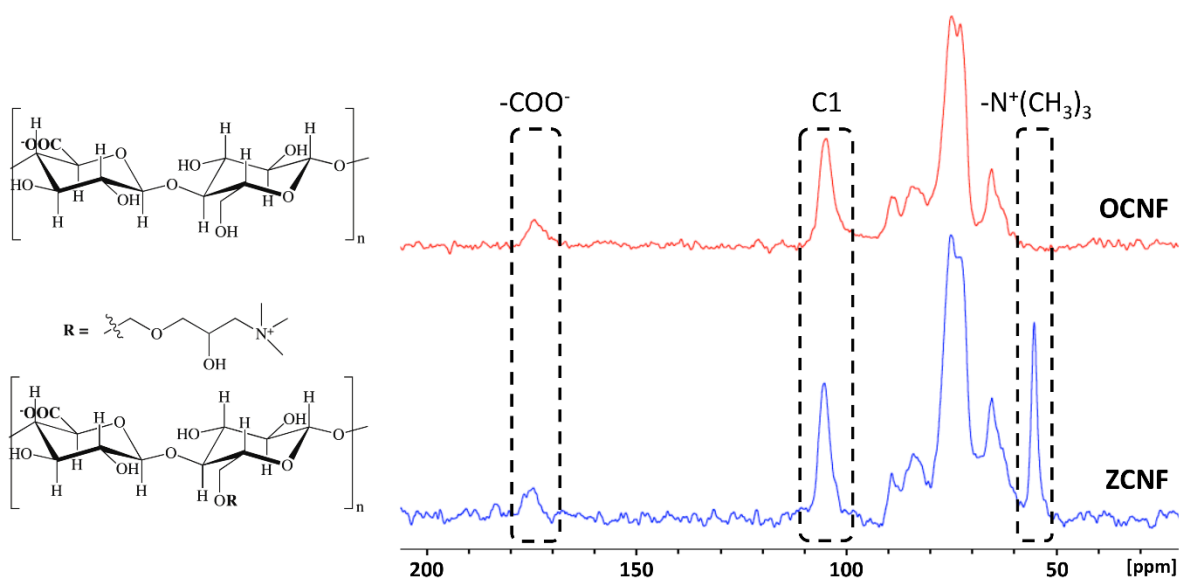

**Fig. S3.**  $^{13}\text{C}$  DP MAS NMR spectra for non-washed ZCNF (blue line) and washed OCNF (red line), after 4k and 8k scans, respectively, acquired at 10 kHz MAS rate and 200 s relaxation delay. The

peaks corresponding to the anomeric carbon and the functionalisation groups are highlighted within dashed rectangles. A degree of oxidation (DO = ratio between the peak area of the carboxyl group and the anomeric carbon) of *ca.* 25 % was obtained for both powders.

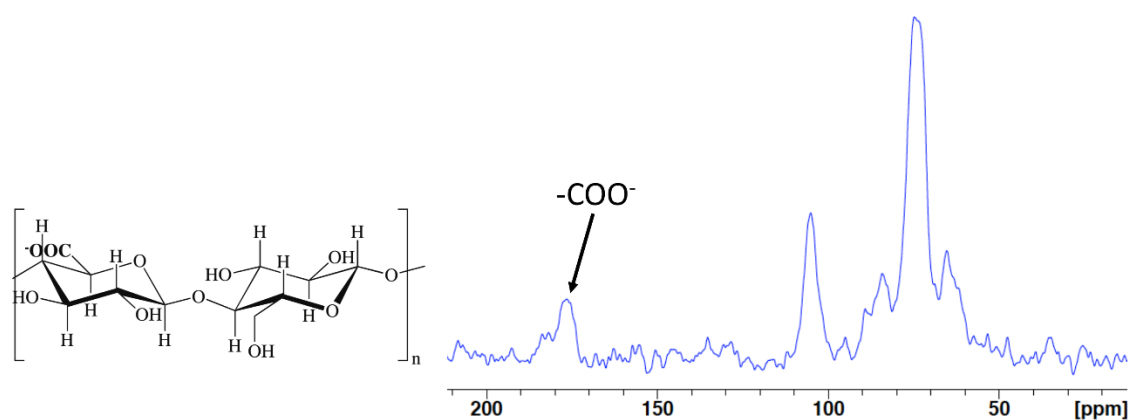

**Fig. S4.**  $^{13}\text{C}\{^1\text{H}\}$  DP MAS NMR spectra for washed OCNF powder after 512 scans, acquired on a 300 MHz spectrometer at 10 kHz MAS rate and 800 s relaxation delay to allow for complete  $^{13}\text{C}$  relaxation.<sup>3</sup> A line broadening of 80 Hz was used.

## References

- 1 D. da Silva Perez, S. Montanari and M. R. Vignon, *Biomacromolecules*, 2003, **4**, 1417–1425.
- 2 M. Zaman, H. Xiao, F. Chibante and Y. Ni, *Carbohydr. Polym.*, 2012, **89**, 163–170.
- 3 K. Wickholm, P. T. Larsson and T. Iversen, *Carbohydr. Res.*, 1998, **312**, 123–129.
